# Supplementary material for: Reproductive Success Dynamics Could Limit Precision in Close-Kin Mark–Recapture Abundance Estimation for Atlantic Goliath Grouper (Epinephelus itajara)
Source: MDPI journal article supplement (doi:10.3390/fishes8050254), 2023-05-10
Supplement: s1 [file s1]

# Reproductive Success Dynamics Could Limit Precision in Close-Kin Mark–Recapture Abundance Estimation for Atlantic Goliath Grouper (*Epinephelus itajara*)

Michael D. Tringali

Fish and Wildlife Research Institute, FL Fish and Wildlife Conservation Commission,  
100 Eighth Avenue S.E., Saint Petersburg, FL 33701, USA; mike.tringali@myfwc.com

## ***Molecular markers for this study***

Multilocus genotypes were built with microsatellite DNA allelic data over 36 loci. Twenty-nine of the loci were isolated and characterized in-house from a goliath grouper library as described in Seyoum et al. (2013); assay procedures and the analytical suitability of these markers, including conformance to Hardy-Weinberg and population genotypic equilibrium expectations, were reported therein. The remaining seven loci were developed in-house as well, but from a Red Grouper (*Epinephelus morio*) library. Procedures are described in below, with cross-species amplification testing and QAQC information for goliath grouper provided.

## ***Isolation and characterization of red grouper (*Epinephelus morio*) microsatellite markers used in the Atlantic Goliath Grouper study.***

Genomic screening of the red grouper library was conducted using the PCR-based isolation of microsatellite arrays (PIMA) method of Lunt et al. (1999), with modifications as reported in Seyoum et al. (2005). Briefly, 50-100 ng of the total DNA was used as the template for multiple randomly amplified polymorphic DNA (RAPD) polymerase chain reactions, PCRs, each with three different RAPD primers following procedures described in Seyoum et al. (2005). The PCR products were purified (Agilent Technologies, Santa Clara, CA) and cloned into plasmid T-vectors (Bluescript PBC KS-, Agilent Technologies). Recombinant colonies were screened by performing PCRs (12.5-μL total reaction volume) containing T3 and T7 vector primers and three repeat-specific primers [5'-(AC)<sub>8</sub>-3', 5'-(AG)<sub>8</sub>-3', 5'-(AGC)<sub>5</sub>-3', 5'-(ACT)<sub>12</sub>-3', 5'-(ACC)<sub>6</sub>-3', as described in Seyoum et al. (2005). Colonies having two or more bands when the PCR product was electrophoresed through 1.5% low-EEO agarose gels were flagged as microsatellite candidates and were transferred to new agar plates for overnight growth at 37°C. Another round of PCR amplification was performed with the selected colonies using only vector primers; the resulting amplification products were purified and cycle-sequenced from both directions using BigDye Terminator v3.1 Cycle Sequencing Kit (Applied Biosystems, Inc. Foster City CA). Sequencing products were visualized on an Applied Biosystems Prism™ 3130XL Genetic Analyzer.

Primers were designed for 33 candidate loci by using the OligoPerfect™ Designer (Invitrogen) with annealing temperature between 58°C and 60°C. Loci were designed such that cloned fragment sizes of the seminal specimen generally occurred within one of three ranges (i.e., 90-115 bp, 125-170 bp, or 190-300

bp). Forward primers were 5'-end-labeled with a fluorescent dye that corresponded to one of the size ranges. PCR was conducted with 100 ng of DNA and three primers, one from each of the three fragment-size category, in 12.5- $\mu$ L reaction volume following the step-down protocol described in Seyoum et al. (2016). Fragments were visualized on an ABI 3130XL genetic analyzer alongside ROX-labeled size standard GeneScan-500 (Applied Biosystems, Inc.) and genotyped using GENEMAPPER software version 4.0 (Applied Biosystems, Inc.).

Cross-amplifications were performed for 388 specimens of *E. itejara* from the Florida Atlantic and Florida Gulf of Mexico. Seven loci (**Table S1**) were judged to be reliable and sufficiently informative (variable) for project goals.

**Table S1.** Characteristics of 7 polymorphic microsatellite loci in 50 specimens of Red Grouper (*Epinephelus morio*) from Tampa Bay, Florida.

| Locus | Primer Sequence (5'→3')<br>Forward/Reverse          | Repeat<br>motif                       | Allele sizes<br>red grouper | Allele sizes<br>goliath grouper | GenBank<br>Accession |
|-------|-----------------------------------------------------|---------------------------------------|-----------------------------|---------------------------------|----------------------|
| Em14  | CTCCCAAAGGATTATACAGAGGA<br>AAATGAGTAAGAGGCTTTGATGCT | (AC) <sub>6</sub> /(CA) <sub>22</sub> | 125-169                     | 119-141                         | KX833917             |
| Em15  | GTGCATGCATGTATCTGTGTAAGA<br>ACAGGGTCAGTGAGTGAGATT   | (AC) <sub>9</sub>                     | 189-202                     | 192-210                         | KX833918             |
| Em22  | GCATGCTTTTACATGGTTGTGT<br>AGTGGAGATGTGTGTGTGTG      | (AC) <sub>8</sub>                     | 104-126                     | 106-124                         | KX833924             |
| Em23  | GATGTGGCTTCTCTTCTAAAACA<br>TTTATCTGTAGGCCTATCGTTTGC | (TG) <sub>11</sub>                    | 139-147                     | 158-190                         | KX833925             |
| Em24  | TTTAAGGGACTTTCTCTCTCAGC<br>ACACTTTTATTGATCCACGATTT  | (CA) <sub>8</sub>                     | 208-234                     | 224-242                         | KX833926             |
| Em28  | TCCTGCGCTTATTTCAAACATTA<br>GAGTGTGAGTGGTGAAAAGATTTG | (TG) <sub>14</sub>                    | 109-129                     | 109-123                         | KX833930             |
| Em33  | ATTGTCGTTGGGTAGTGTACAGA<br>GGACATGATCAGTGATATTTGGTG | (GT) <sub>11</sub>                    | 250-308                     | 266-286                         | KX833935             |

### **General assay procedures for the current study**

Total genomic DNA was isolated using the PUREGENE DNA Purification Kit (Gentra Systems, Minneapolis, Minnesota), according to manufacturer's instructions. PCR was performed using the primer pairs in **Table S1** and from **Table 1** of Seyoum et al. (2013). Template-free negative controls were employed in all PCR reactions. Following PCR, a mixture containing 1.0  $\mu$ L of PCR product, 12.5  $\mu$ L Hi-Di formamide, and 0.15  $\mu$ L GSROX500 was denatured (95°C, 4 m) and snap-cooled on ice. Fragments were visualized on a 3130XL Genetic Analyzer (Applied Biosystems) and processed using GENEMAPPER software v4.0.

Numbers of alleles, allelic richness ( $AR$ ), observed and expected heterozygosities ( $H_O$  and  $H_E$ ), gene diversities, and inbreeding coefficients ( $F_{IS}$ ) were determined using *GENEPOP* v4.7 and *FSTAT* v2.9.3.2; exact tests for Hardy-Weinberg equilibrium within loci and linkage disequilibrium between loci were conducted using *GENEPOP* v4.7 (Goudet 1995; Raymond and Rousset 1995; Rousset 2008). Single locus

$F_{IS}$  estimates were computed as in Weir and Cockerham (1984) and averaged over all loci. No departures from HWE were detected and, based on probabilities for pairwise estimates of linkage disequilibrium, following sequential Bonferroni adjustment to exact test results, there was no table-wide support for a hypothesis of nonindependence between any locus-pair. The observed value of  $F_{IS}$  was 0.021 and significantly positive ( $p = 0.00139$ ). Allelic richness (AR) is displayed in **Figure S1**; single-locus gene diversities in **Figure S2**; green color = goliath grouper loci; red color = red grouper loci. Over all loci, the average number of alleles was 6.75; gene diversities for polymorphic loci ranged from 0.207 to 0.863 (mean = 0.575).

**Figure S1.** Alellic richness.

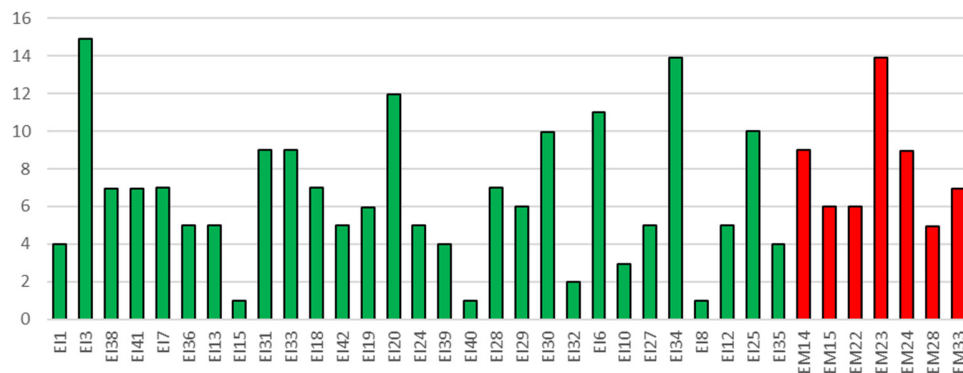

**Figure S2.** Single-locus gene diversities.

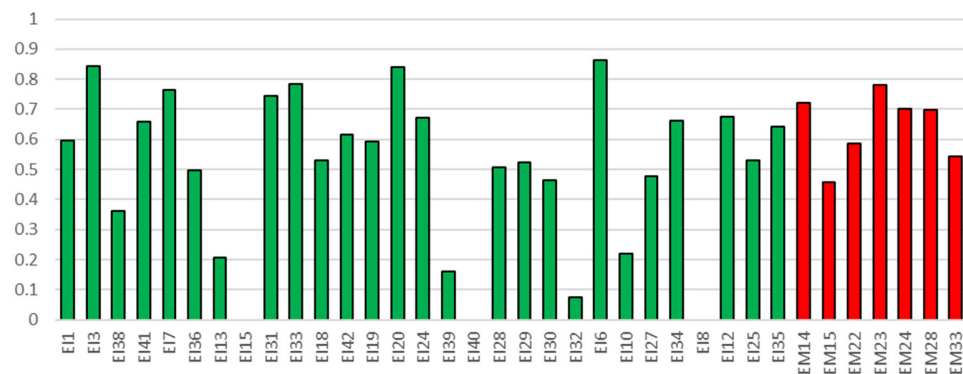

### ***In silico adjustment of possible sources of estimation bias***

For the goliath grouper sample, the 2011, 2012, and 2103 sample groups contained fish collected from the same locality that ranged in age from 4 – 19 yr. Given a generation length of ~20 yr, it is appropriate to treat the pooled combination of all three groups as comprising single mixed-age, adult population sample. In silico adjustments were made for mixed-age sampling and physical linkage among loci as follows:

**Mixed-age samples:** The raw point estimate of  $N_e$  could in theory be downwardly biased to a degree because in all studied populations it was based on ‘mixed-age’ adult samples. That is,

additional (artefactual) linkage disequilibrium could have been created by sampling across multiple year classes if those year classes originated with slightly differing allele frequencies. Waples et al. (2014) showed that a downward bias of up to 20-30% might be generally expected given  $\tau/T \approx 3$  for the studied subpopulation. Therefore, a bias adjustment was applied to raw estimates of  $N_e$  for goliath grouper.

**Physical linkage:** Removal of genotypes from recaptured goliath grouper eliminated the opportunity for downward bias in the  $N_e$  estimate due to redundancy. However, LD in physically linked loci can be elevated by limited recombination and if it is not accounted for, it can cause estimates of  $N_e$  to be biased downward. As noted above, there was no table-wide support for a hypothesis of linkage disequilibrium between any locus-pair. Further, it was shown in Waples et al. (2016) that the magnitude of bias in  $N_e$  is strongly and negatively correlated with the number of chromosomes and their length, providing two possible methods for bias adjustment. Goliath grouper is known to have 24 chromosomes. Using the relationship based on the number of chromosomes, a correction factor of  $1/0.794 = 1.259$  was obtained.

**Table S2.** Primary data for genetically surveyed specimens.

| Fish # | Date      | Site Name          | Latitude  | Longitude | TL cm | Age |
|--------|-----------|--------------------|-----------|-----------|-------|-----|
| 123    | 6/20/2011 | Bahia Honda Bridge | 24°39.491 | 81°17.326 | 144   | 7   |
| 124    | 6/20/2011 | Bahia Honda Bridge | 24°39.491 | 81°17.326 | 110   | 5   |
| 125    | 6/20/2011 | Bahia Honda Bridge | 24°39.491 | 81°17.326 | 157   | 6   |
| 126    | 6/20/2011 | Bahia Honda Bridge | 24°39.491 | 81°17.326 | 127   | 4   |
| 127    | 6/20/2011 | Bahia Honda Bridge | 24°39.491 | 81°17.326 | 131   | 5   |
| 128    | 6/27/2011 | Sun Tug            | 26°58.478 | 80°00.094 | 143   | 8   |
| 129    | 6/27/2011 | Sun Tug            | 26°58.478 | 80°00.094 | 140   | 7   |
| 130    | 6/27/2011 | Sun Tug            | 26°58.478 | 80°00.094 | 201   | 13  |
| 131    | 6/27/2011 | Sun Tug            | 26°58.478 | 80°00.094 | 191   |     |
| 132    | 6/27/2011 | Sun Tug            | 26°58.478 | 80°00.094 | 180   | 12  |
| 133    | 6/27/2011 | Sun Tug            | 26°58.478 | 80°00.094 | 179   | 9   |
| 134    | 6/27/2011 | Sun Tug            | 26°58.478 | 80°00.094 | 148   | 8   |
| 135    | 6/27/2011 | Sun Tug            | 26°58.478 | 80°00.094 | 180   | 13  |
| 136    | 6/27/2011 | Sun Tug            | 26°58.478 | 80°00.094 | 149   | 9   |
| 137    | 6/27/2011 | MG111              | 26°58.640 | 80°01.496 | 104   | 4   |
| 138    | 6/27/2011 | MG111              | 26°58.640 | 80°01.496 | 191   | 10  |
| 139    | 6/27/2011 | MG111              | 26°58.640 | 80°01.496 | 129   | 7   |
| 140    | 6/27/2011 | MG111              | 26°58.640 | 80°01.496 | 187   |     |
| 141    | 6/27/2011 | MG111              | 26°58.640 | 80°01.496 | 176   | 13  |
| 142    | 6/27/2011 | MG111              | 26°58.640 | 80°01.496 | 170   | 9   |
| 143    | 6/27/2011 | MG111              | 26°58.640 | 80°01.496 | 173   | 11  |
| 144    | 6/27/2011 | MG111              | 26°58.640 | 80°01.496 | 141   | 8   |

|     |           |                                 |           |           |     |    |
|-----|-----------|---------------------------------|-----------|-----------|-----|----|
| 145 | 6/28/2011 | 3-Hole                          | 27°00.215 | 80°03.991 | 145 | 8  |
| 146 | 6/28/2011 | 3-Hole                          | 27°00.215 | 80°03.991 | 168 |    |
| 147 | 6/28/2011 | 3-Hole                          | 27°00.215 | 80°03.991 | 134 |    |
| 148 | 6/28/2011 | 3-Hole                          | 27°00.215 | 80°03.991 | 183 |    |
| 149 | 6/28/2011 | 3-Hole                          | 27°00.215 | 80°03.991 | 179 | 11 |
| 150 | 6/28/2011 | 3-Hole                          | 27°00.215 | 80°03.991 | 117 | 6  |
| 151 | 6/28/2011 | 3-Hole                          | 27°00.215 | 80°03.991 | 127 |    |
| 152 | 6/28/2011 | Tunnels                         | 26°56.78  | 80°00.88  | 142 | 7  |
| 153 | 6/28/2011 | Tunnels                         | 26°56.78  | 80°00.88  | 158 | 9  |
| 154 | 6/28/2011 | Tunnels                         | 26°56.78  | 80°00.88  | 122 | 7  |
| 155 | 6/28/2011 | Tunnels                         | 26°56.78  | 80°00.88  | 127 | 7  |
| 156 | 6/28/2011 | Tunnels                         | 26°56.78  | 80°00.88  | 155 |    |
| 157 | 6/28/2011 | Tunnels                         | 26°56.78  | 80°00.88  | 161 | 8  |
| 158 | 6/28/2011 | Tunnels                         | 26°56.78  | 80°00.88  | 137 | 8  |
| 159 | 6/28/2011 | Tunnels                         | 26°56.78  | 80°00.88  | 152 | 7  |
| 160 | 6/29/2011 | Zion Train                      | 26°57.81  | 80°00.40  | 154 |    |
| 161 | 6/29/2011 | Zion Train                      | 26°57.81  | 80°00.40  | 168 | 8  |
| 162 | 6/29/2011 | Zion Train                      | 26°57.81  | 80°00.40  | 166 | 9  |
| 163 | 6/29/2011 | Zion Train                      | 26°57.81  | 80°00.40  | 152 | 7  |
| 164 | 6/29/2011 | Zion Train                      | 26°57.81  | 80°00.40  | 173 | 10 |
| 165 | 6/29/2011 | Zion Train                      | 26°57.81  | 80°00.40  | 165 | 11 |
| 166 | 6/29/2011 | Zion Train                      | 26°57.81  | 80°00.40  | 150 | 10 |
| 167 | 6/29/2011 | Zion Train                      | 26°57.81  | 80°00.40  | 155 |    |
| 168 | 6/29/2011 | Zion Train                      | 26°57.81  | 80°00.40  | 186 | 9  |
| 169 | 6/29/2011 | Zion Train                      | 26°57.81  | 80°00.40  | 215 | 15 |
| 171 | 6/29/2011 | Zion Train                      | 26°57.81  | 80°00.40  | 187 |    |
| 172 | 6/29/2011 | Zion Train                      | 26°57.81  | 80°00.40  | 177 |    |
| 173 | 6/29/2011 | Zion Train                      | 26°57.81  | 80°00.40  | 180 |    |
| 174 | 6/29/2011 | Zion Train                      | 26°57.81  | 80°00.40  | 138 | 8  |
| 175 | 8/12/2011 | 3-Hole                          | 27°00.215 | 80°03.991 | 133 | 7  |
| 177 | 8/12/2011 | Tunnels                         | 26°56.81  | 80°02.047 | 145 |    |
| 178 | 8/12/2011 | Tunnels                         | 26°56.81  | 80°02.047 | 136 | 7  |
| 179 | 8/12/2011 | Tunnels                         | 26°56.81  | 80°02.047 | 132 | 9  |
| 180 | 8/12/2011 | Tunnels                         | 26°56.81  | 80°02.047 | 165 | 7  |
| 181 | 8/13/2011 | 3-Hole                          | 27°00.223 | 80°03.993 | 220 | 16 |
| 182 | 8/14/2011 | South FAD and assoc. rock piles | 26°54.979 | 80°02.827 | 170 | 9  |
| 183 | 8/14/2011 | South FAD and assoc. rock piles | 26°54.979 | 80°02.827 | 189 | 13 |
| 184 | 8/14/2011 | South FAD and assoc. rock piles | 26°54.979 | 80°02.827 | 215 | 11 |
| 185 | 8/14/2011 | South FAD and assoc. rock piles | 26°54.979 | 80°02.827 | 201 | 12 |

|     |           |                                 |           |           |     |    |
|-----|-----------|---------------------------------|-----------|-----------|-----|----|
| 186 | 8/14/2011 | South FAD and assoc. rock piles | 26°54.979 | 80°02.827 | 192 | 11 |
| 187 | 8/14/2011 | South FAD and assoc. rock piles | 26°54.979 | 80°02.827 | 151 | 5  |
| 188 | 8/14/2011 | South FAD and assoc. rock piles | 26°54.979 | 80°02.827 | 126 | 4  |
| 189 | 8/14/2011 | North FAD                       | 26°57.864 | 80°03.693 | 192 | 9  |
| 190 | 8/14/2011 | North FAD                       | 26°57.864 | 80°03.693 | 185 | 8  |
| 191 | 8/15/2011 | Gulfland                        |           |           | 123 | 4  |
| 192 | 8/15/2011 | 3-Hole                          | 27°00.223 | 80°03.993 | 207 | 10 |
| 193 | 8/15/2011 | 3-Hole                          | 27°00.223 | 80°03.993 | 171 | 9  |
| 194 | 8/15/2011 | 3-Hole                          | 27°00.223 | 80°03.993 | 136 | 7  |
| 195 | 8/15/2011 | 3-Hole                          | 27°00.223 | 80°03.993 | 154 | 10 |
| 196 | 8/15/2011 | 3-Hole                          | 27°00.223 | 80°03.993 | 155 | 6  |
| 197 | 8/15/2011 | 3-Hole                          | 27°00.223 | 80°03.993 | 167 | 7  |
| 203 | 9/10/2011 | 3-Hole                          | 27°00.223 | 80°03.993 | 182 | 11 |
| 204 | 9/10/2011 | 3-Hole                          | 27°00.223 | 80°03.993 | 153 | 8  |
| 205 | 9/11/2011 |                                 |           |           | 186 | 10 |
| 206 | 9/11/2011 |                                 |           |           | 177 | 11 |
| 207 | 9/11/2011 |                                 |           |           | 186 | 10 |
| 208 | 9/11/2011 |                                 |           |           | 178 | 11 |
| 209 | 9/11/2011 |                                 |           |           | 176 | 8  |
| 210 | 9/11/2011 |                                 |           |           | 183 | 9  |
| 211 | 9/12/2011 | MG111                           | 26°58.640 | 80°01.496 | 180 | 7  |
| 212 | 9/12/2011 | MG111                           | 26°58.640 | 80°01.496 | 200 | 14 |
| 213 | 9/12/2011 | MG111                           | 26°58.640 | 80°01.496 | 195 | 17 |
| 214 | 9/12/2011 | MG111                           | 26°58.640 | 80°01.496 | 170 | 10 |
| 215 | 9/12/2011 | MG111                           | 26°58.640 | 80°01.496 | 210 |    |
| 216 | 9/12/2011 | MG111                           | 26°58.640 | 80°01.496 | 128 | 6  |
| 217 | 9/12/2011 | MG111                           | 26°58.640 | 80°01.496 | 169 | 7  |
| 218 | 9/12/2011 | MG111                           | 26°58.640 | 80°01.496 | 162 | 8  |
| 219 | 9/12/2011 | MG111                           | 26°58.640 | 80°01.496 | 166 | 9  |
| 220 | 9/12/2011 | MG111                           | 26°58.640 | 80°01.496 | 162 | 6  |
| 221 | 9/12/2011 | MG111                           | 26°58.640 | 80°01.496 | 161 | 11 |
| 224 | 9/30/2011 | Zion Train                      | 26°57.769 | 80°00.444 | 162 | 9  |
| 225 | 9/30/2011 | Zion Train                      | 26°57.769 | 80°00.444 | 163 | 7  |
| 226 | 9/30/2011 | Zion Train                      | 26°57.769 | 80°00.444 | 181 | 12 |
| 227 | 9/30/2011 | Zion Train                      | 26°57.769 | 80°00.444 | 160 | 9  |
| 228 | 10/2/2011 | Zion Train                      | 26°57.769 | 80°00.444 | 196 |    |
| 229 | 10/2/2011 | Zion Train                      | 26°57.769 | 80°00.444 | 188 | 9  |
| 230 | 10/2/2011 | Zion Train                      | 26°57.769 | 80°00.444 | 150 | 9  |
| 231 | 10/2/2011 | Zion Train                      | 26°57.769 | 80°00.444 | 162 | 9  |

|     |           |                           |           |           |     |    |
|-----|-----------|---------------------------|-----------|-----------|-----|----|
| 232 | 10/2/2011 | Zion Train                | 26°57.769 | 80°00.444 | 165 | 11 |
| 233 | 10/2/2011 | Zion Train                | 26°57.769 | 80°00.444 | 156 | 9  |
| 234 | 10/2/2011 | Zion Train                | 26°57.769 | 80°00.444 | 164 | 7  |
| 235 | 10/2/2011 | Zion Train                | 26°57.769 | 80°00.444 | 177 | 11 |
| 246 | 3/31/2012 | 3-Hole                    | 27°00.223 | 80°03.993 | 156 | 12 |
| 247 | 3/31/2012 | 3-Hole                    | 27°00.223 | 80°03.993 | 178 | 10 |
| 248 | 3/31/2012 | 3-Hole                    | 27°00.223 | 80°03.993 | 145 | 8  |
| 256 | 7/15/2012 | Following Long liner boat | 27°02.77  | 80°02.04  | 180 | 12 |
| 258 | 7/15/2012 | Following Long liner boat | 27°02.77  | 80°02.04  | 145 | 8  |
| 259 | 7/15/2012 | Following Long liner boat | 27°02.77  | 80°02.04  | 156 |    |
| 260 | 7/15/2012 | Following Long liner boat | 27°06.3   | 80°02.6   | 142 | 9  |
| 262 | 7/15/2012 | Following Long liner boat | 27°06.3   | 80°02.6   | 186 | 9  |
| 266 | 7/16/2012 | 3-Hole                    | 27°00.223 | 80°03.993 | 134 | 6  |
| 267 | 7/16/2012 | 3-Hole                    | 27°00.223 | 80°03.993 | 127 | 5  |
| 268 | 7/16/2012 | 3-Hole                    | 27°00.223 | 80°03.993 | 188 | 12 |
| 269 | 7/16/2012 | 3-Hole                    | 27°00.223 | 80°03.993 | 162 |    |
| 270 | 7/16/2012 | 3-Hole                    | 27°00.223 | 80°03.993 | 188 | 17 |
| 272 | 7/16/2012 | 3-Hole                    | 27°00.223 | 80°03.993 | 174 | 11 |
| 274 | 7/16/2012 | Zion Train                | 26°57.769 | 80°00.444 | 188 | 12 |
| 275 | 7/16/2012 | Zion Train                | 26°57.769 | 80°00.444 | 180 |    |
| 276 | 7/16/2012 | Zion Train                | 26°57.769 | 80°00.444 | 169 | 11 |
| 279 | 7/16/2012 | Zion Train                | 26°57.769 | 80°00.444 | 171 | 10 |
| 280 | 7/16/2012 | Zion Train                | 26°57.769 | 80°00.444 | 156 | 8  |
| 281 | 7/16/2012 | Zion Train                | 26°57.769 | 80°00.444 | 192 | 12 |
| 283 | 7/16/2012 | Zion Train                | 26°57.769 | 80°00.444 | 182 |    |
| 284 | 7/16/2012 | Zion Train                | 26°57.769 | 80°00.444 | 162 | 11 |
| 285 | 7/16/2012 |                           |           |           | 189 | 10 |
| 287 | 7/17/2012 |                           |           |           | 160 | 11 |
| 290 | 7/17/2012 | Zion Train                | 26°57.769 | 80°00.444 | 187 |    |
| 291 | 7/17/2012 | Zion Train                | 26°57.769 | 80°00.444 | 153 | 5  |
| 292 | 7/17/2012 | Zion Train                | 26°57.769 | 80°00.444 | 176 | 14 |
| 293 | 7/17/2012 | Zion Train                | 26°57.769 | 80°00.444 | 213 | 19 |
| 300 | 8/6/2012  | 3-Hole                    | 27°00.223 | 80°03.993 | 183 | 10 |
| 301 | 8/6/2012  | 3-Hole                    | 27°00.223 | 80°03.993 | 172 |    |
| 302 | 8/6/2012  | 3-Hole                    | 27°00.223 | 80°03.993 | 168 |    |
| 303 | 8/6/2012  | 3-Hole                    | 27°00.223 | 80°03.993 | 194 | 10 |
| 304 | 8/6/2012  | 3-Hole                    | 27°00.223 | 80°03.993 | 146 | 6  |
| 306 | 8/18/2012 | Sun Tug                   | 26°58.478 | 80°00.094 | 132 | 5  |
| 307 |           |                           |           |           |     |    |

|     |           |            |           |           |     |    |
|-----|-----------|------------|-----------|-----------|-----|----|
| 308 | 8/18/2012 | Sun Tug    | 26°58.478 | 80°00.094 | 148 | 8  |
| 309 | 8/18/2012 | Sun Tug    | 26°58.478 | 80°00.094 | 168 | 12 |
| 310 | 8/19/2012 | MG111      | 26°58.640 | 80°01.496 | 181 | 10 |
| 311 | 8/19/2012 | MG111      | 26°58.640 | 80°01.496 | 175 | 9  |
| 312 | 8/19/2012 | MG111      | 26°58.640 | 80°01.496 | 189 | 8  |
| 314 | 8/19/2012 | MG111      | 26°58.640 | 80°01.496 | 143 | 8  |
| 315 | 8/19/2012 | MG111      | 26°58.640 | 80°01.496 | 173 | 10 |
| 316 | 8/19/2012 | MG111      | 26°58.640 | 80°01.496 | 139 | 5  |
| 317 | 8/19/2012 | MG111      | 26°58.640 | 80°01.496 | 176 | 11 |
| 318 | 8/19/2012 | MG111      | 26°58.640 | 80°01.496 | 152 | 9  |
| 319 | 8/19/2012 | MG111      | 26°58.640 | 80°01.496 | 185 | 8  |
| 320 | 8/19/2012 | MG111      | 26°58.640 | 80°01.496 | 167 | 9  |
| 321 | 8/19/2012 | MG111      | 26°58.640 | 80°01.496 | 163 | 8  |
| 323 | 8/31/2012 | Zion Train | 26°57.769 | 80°00.444 | 145 | 7  |
| 326 | 8/31/2012 | Zion Train | 26°57.769 | 80°00.444 | 172 | 7  |
| 327 | 8/31/2012 | Zion Train | 26°57.769 | 80°00.444 | 163 | 9  |
| 328 | 8/31/2012 | Zion Train | 26°57.769 | 80°00.444 | 143 | 10 |
| 329 | 8/31/2012 | Zion Train | 26°57.769 | 80°00.444 | 178 | 12 |
| 330 | 8/31/2012 | Zion Train | 26°57.769 | 80°00.444 | 166 | 10 |
| 332 | 8/31/2012 | Zion Train | 26°57.769 | 80°00.444 | 166 | 9  |
| 333 | 8/31/2012 | Zion Train | 26°57.769 | 80°00.444 | 160 | 11 |
| 334 | 8/31/2012 | Zion Train | 26°57.769 | 80°00.444 | 175 | 10 |
| 335 | 8/31/2012 | Zion Train | 26°57.769 | 80°00.444 | 200 | 14 |
| 336 | 8/31/2012 | Zion Train | 26°57.769 | 80°00.444 | 115 | 5  |
| 337 | 8/31/2012 | Zion Train | 26°57.769 | 80°00.444 | 140 | 9  |
| 338 | 8/31/2012 | Zion Train | 26°57.769 | 80°00.444 | 149 | 10 |
| 340 | 8/31/2012 | Zion Train | 26°57.769 | 80°00.444 | 166 | 10 |
| 341 | 8/31/2012 | Zion Train | 26°57.769 | 80°00.444 | 170 | 10 |
| 342 | 8/31/2012 | Zion Train | 26°57.769 | 80°00.444 | 146 | 8  |
| 343 | 8/31/2012 | Zion Train | 26°57.769 | 80°00.444 | 180 | 11 |
| 344 | 8/31/2012 | Zion Train | 26°57.769 | 80°00.444 | 167 | 11 |
| 345 | 8/31/2012 | Zion Train | 26°57.769 | 80°00.444 | 147 | 9  |
| 347 | 9/1/2012  | Zion Train | 26°57.769 | 80°00.444 | 162 | 7  |
| 348 | 9/1/2012  | Zion Train | 26°57.769 | 80°00.444 | 162 | 9  |
| 349 | 9/1/2012  | Zion Train | 26°57.769 | 80°00.444 | 168 | 9  |
| 350 | 9/1/2012  | Zion Train | 26°57.769 | 80°00.444 | 143 | 12 |
| 351 | 9/1/2012  | Zion Train | 26°57.769 | 80°00.444 | 211 | 19 |
| 352 | 9/1/2012  | Zion Train | 26°57.769 | 80°00.444 | 181 | 10 |
| 353 | 9/1/2012  | Zion Train | 26°57.769 | 80°00.444 | 178 | 9  |



|     |           |               |           |           |     |    |
|-----|-----------|---------------|-----------|-----------|-----|----|
| 354 | 9/1/2012  | Zion Train    | 26°57.769 | 80°00.444 | 163 | 11 |
| 355 | 9/1/2012  | Zion Train    | 26°57.769 | 80°00.444 | 167 | 9  |
| 356 | 9/1/2012  | Zion Train    | 26°57.769 | 80°00.444 | 163 | 10 |
| 357 | 9/1/2012  | Zion Train    | 26°57.769 | 80°00.444 | 158 | 7  |
| 359 | 9/1/2012  | Zion Train    | 26°57.769 | 80°00.444 | 195 | 14 |
| 360 | 9/1/2012  | Zion Train    | 26°57.769 | 80°00.444 | 189 | 13 |
| 361 | 9/1/2012  | Zion Train    | 26°57.769 | 80°00.444 | 172 | 8  |
| 362 | 9/1/2012  | Sun Tug       | 26°58.478 | 80°00.094 | 174 | 15 |
| 363 | 9/1/2012  | Sun Tug       | 26°58.478 | 80°00.094 | 163 | 8  |
| 365 | 9/1/2012  | Sun Tug       | 26°58.478 | 80°00.094 | 162 | 10 |
| 366 | 9/1/2012  | Sun Tug       | 26°58.478 | 80°00.094 | 177 | 10 |
| 367 | 9/1/2012  | Sun Tug       | 26°58.478 | 80°00.094 | 167 | 10 |
| 372 | 9/2/2012  | Tunnels       | 26°56.81  | 80°02.047 | 148 | 9  |
| 373 | 9/2/2012  | MG111         | 26°58.640 | 80°01.496 | 129 | 9  |
| 374 | 9/2/2012  | MG111         | 26°58.640 | 80°01.496 | 186 | 12 |
| 375 | 9/2/2012  | MG111         | 26°58.640 | 80°01.496 | 177 | 10 |
| 376 | 9/2/2012  | MG111         | 26°58.640 | 80°01.496 | 122 | 7  |
| 377 | 9/2/2012  | MG111         | 26°58.640 | 80°01.496 | 168 | 10 |
| 378 | 9/2/2012  | MG111         | 26°58.640 | 80°01.496 | 158 | 9  |
| 380 | 9/2/2012  | MG111         | 26°58.640 | 80°01.496 | 158 | 10 |
| 382 | 9/2/2012  | MG111         | 26°58.640 | 80°01.496 | 189 | 14 |
| 383 | 9/2/2012  | MG111         | 26°58.640 | 80°01.496 | 200 | 13 |
| 384 | 9/2/2012  | MG111         | 26°58.640 | 80°01.496 | 185 | 11 |
| 385 | 9/2/2012  | MG111         | 26°58.640 | 80°01.496 | 167 | 8  |
| 389 | 9/2/2012  | MG111         | 26°58.640 | 80°01.496 | 154 | 11 |
| 390 | 9/2/2012  | MG111         | 26°58.640 | 80°01.496 | 174 | 8  |
| 391 | 9/2/2012  | MG111         | 26°58.640 | 80°01.496 | 157 | 9  |
| 393 | 9/2/2012  | MG111         | 26°58.640 | 80°01.496 | 225 | 16 |
| 394 | 9/2/2012  | MG111         | 26°58.640 | 80°01.496 | 155 | 10 |
| 395 | 9/2/2012  | MG111         | 26°58.640 | 80°01.496 | 197 | 17 |
| 396 | 9/2/2012  | MG111         | 26°58.640 | 80°01.496 | 161 | 8  |
| 397 | 9/2/2012  | MG111         | 26°58.640 | 80°01.496 | 178 | 11 |
| 398 | 9/2/2012  | MG111         | 26°58.640 | 80°01.496 | 152 | 10 |
| 400 | 9/2/2012  | MG111         | 26°58.640 | 80°01.496 | 157 | 8  |
| 401 | 9/2/2012  | Sea Inspector |           |           | 149 | 9  |
| 402 | 9/2/2012  | Sun Tug       | 26°58.478 | 80°00.094 | 122 | 6  |
| 403 | 9/2/2012  | Sun Tug       | 26°58.478 | 80°00.094 | 171 | 10 |
| 404 | 9/2/2012  | Sun Tug       | 26°58.478 | 80°00.094 | 182 | 11 |
| 405 | 9/15/2012 | Zion Train    | 26°57.769 | 80°00.444 | 148 | 8  |

|     |           |            |           |           |     |    |
|-----|-----------|------------|-----------|-----------|-----|----|
| 406 | 9/15/2012 | Zion Train | 26°57.769 | 80°00.444 | 164 | 9  |
| 407 | 9/15/2012 | Zion Train | 26°57.769 | 80°00.444 | 156 | 9  |
| 409 | 9/15/2012 | Zion Train | 26°57.769 | 80°00.444 | 173 | 8  |
| 410 | 9/15/2012 | Zion Train | 26°57.769 | 80°00.444 | 152 | 9  |
| 411 | 9/15/2012 | Zion Train | 26°57.769 | 80°00.444 | 182 | 11 |
| 412 | 9/15/2012 | Zion Train | 26°57.769 | 80°00.444 | 187 | 15 |
| 413 | 9/15/2012 | Zion Train | 26°57.769 | 80°00.444 | 208 | 12 |
| 414 | 9/15/2012 | Zion Train | 26°57.769 | 80°00.444 | 125 | 11 |
| 416 | 9/15/2012 | Sun Tug    | 26°58.478 | 80°00.094 | 158 | 11 |
| 417 | 9/15/2012 | Sun Tug    | 26°58.478 | 80°00.094 | 194 | 12 |
| 418 | 9/15/2012 | Sun Tug    | 26°58.478 | 80°00.094 | 160 | 9  |
| 419 | 9/16/2012 | Zion Train | 26°57.769 | 80°00.444 | 182 | 10 |
| 420 | 9/16/2012 | Zion Train | 26°57.769 | 80°00.444 | 167 | 8  |
| 422 | 9/16/2012 | Zion Train | 26°57.769 | 80°00.444 | 192 | 16 |
| 424 | 9/16/2012 | Zion Train | 26°57.769 | 80°00.444 | 158 | 10 |
| 425 | 9/16/2012 | Zion Train | 26°57.769 | 80°00.444 | 155 | 9  |
| 426 | 9/16/2012 | Zion Train | 26°57.769 | 80°00.444 | 167 | 9  |
| 427 | 9/16/2012 | Zion Train | 26°57.769 | 80°00.444 | 145 | 11 |
| 428 | 9/16/2012 | Zion Train | 26°57.769 | 80°00.444 | 180 | 9  |
| 429 | 9/16/2012 | 3-Hole     | 27°00.223 | 80°03.993 | 133 | 7  |
| 430 | 9/16/2012 | 3-Hole     | 27°00.223 | 80°03.993 | 142 | 8  |
| 431 | 9/16/2012 | 3-Hole     | 27°00.223 | 80°03.993 | 105 | 4  |
| 432 | 9/16/2012 | Sun Tug    | 26°58.478 | 80°00.094 | 155 | 10 |
| 433 | 9/16/2012 | Sun Tug    | 26°58.478 | 80°00.094 | 154 | 10 |
| 437 | 9/16/2012 | Zion Train | 26°57.769 | 80°00.444 | 125 | 6  |
| 438 | 9/16/2012 | Zion Train | 26°57.769 | 80°00.444 | 168 | 9  |
| 439 | 9/16/2012 | Zion Train | 26°57.769 | 80°00.444 | 177 | 12 |
| 440 | 9/16/2012 | Zion Train | 26°57.769 | 80°00.444 | 162 | 11 |
| 443 | 9/16/2012 | Zion Train | 26°57.769 | 80°00.444 | 161 | 13 |
| 444 | 9/16/2012 | Zion Train | 26°57.769 | 80°00.444 | 171 | 11 |
| 445 | 9/16/2012 | Zion Train | 26°57.769 | 80°00.444 | 163 | 9  |
| 446 | 9/16/2012 | Zion Train | 26°57.769 | 80°00.444 | 159 | 7  |
| 447 | 9/28/2012 | Sun Tug    | 26°58.478 | 80°00.094 | 160 | 10 |
| 448 | 9/28/2012 | Sun Tug    | 26°58.478 | 80°00.094 | 189 | 13 |
| 449 | 9/28/2012 | Sun Tug    | 26°58.478 | 80°00.094 | 170 | 12 |
| 451 | 9/28/2012 | Sun Tug    | 26°58.478 | 80°00.094 | 170 | 11 |
| 453 | 9/28/2012 | Sun Tug    | 26°58.478 | 80°00.094 | 185 | 12 |
| 454 | 9/28/2012 | Zion Train | 26°57.769 | 80°00.444 | 166 | 9  |
| 455 | 9/28/2012 | Zion Train | 26°57.769 | 80°00.444 | 183 | 11 |

|     |           |            |           |           |     |     |
|-----|-----------|------------|-----------|-----------|-----|-----|
| 456 | 9/28/2012 | Zion Train | 26°57.769 | 80°00.444 | 159 | 10  |
| 457 | 9/28/2012 | Zion Train | 26°57.769 | 80°00.444 | 157 | 9   |
| 458 | 9/28/2012 | Zion Train | 26°57.769 | 80°00.444 | 160 | 8   |
| 459 | 9/28/2012 | Zion Train | 26°57.769 | 80°00.444 | 136 | 10  |
| 461 | 9/28/2012 | Zion Train | 26°57.769 | 80°00.444 | 176 | 12  |
| 464 | 9/29/2012 | Zion Train | 26°57.769 | 80°00.444 | 135 | 6   |
| 465 | 9/29/2012 | Zion Train | 26°57.769 | 80°00.444 | 155 | 8   |
| 466 | 9/28/2012 | Sun Tug    | 26°58.478 | 80°00.094 | 166 | 10  |
| 467 | 9/30/2012 | Zion Train | 26°57.769 | 80°00.444 | 158 | 8   |
| 469 | 9/30/2012 | MG111      | 26°58.640 | 80°01.496 | 162 | 10  |
| 470 | 9/30/2012 | MG111      | 26°58.640 | 80°01.496 | 160 | 9   |
| 477 | 8/18/2012 | Sun Tug    | 26°58.478 | 80°00.094 | 168 |     |
| 478 | 8/18/2012 | Sun Tug    | 26°58.478 | 80°00.094 | 152 | 9   |
| 479 | 8/18/2012 | Sun Tug    | 26°58.478 | 80°00.094 | 205 |     |
| 480 | 8/18/2012 | Sun Tug    | 26°58.478 | 80°00.094 | 185 |     |
| 481 | 8/18/2012 | Sun Tug    | 26°58.478 | 80°00.094 | 198 | 11  |
| 482 | 8/18/2012 | Sun Tug    | 26°58.478 | 80°00.094 | 126 | 5   |
| 483 |           |            |           |           |     |     |
| 484 | 8/8/2013  | Zion Train | 26°57.769 | 80°00.444 | 167 | 9   |
| 485 | 8/8/2013  | Zion Train | 26°57.769 | 80°00.444 | 167 | 11  |
| 486 | 8/8/2013  | Zion Train | 26°57.769 | 80°00.444 | 181 |     |
| 488 | 8/8/2013  | Zion Train | 26°57.769 | 80°00.444 | 164 |     |
| 489 |           |            |           |           |     |     |
| 493 | 8/8/2013  | Zion Train | 26°57.769 | 80°00.444 | 188 | 11  |
| 494 | 8/8/2013  | 3-Hole     | 27°00.223 | 80°03.993 | 152 |     |
| 495 | 8/8/2013  | 3-Hole     | 27°00.223 | 80°03.993 | 129 | 107 |
| 496 | 8/8/2013  | 3-Hole     | 27°00.223 | 80°03.993 | 138 | 9   |
| 497 | 8/8/2013  | 3-Hole     | 27°00.223 | 80°03.993 | 167 |     |
| 498 | 8/8/2013  | 3-Hole     | 27°00.223 | 80°03.993 | 168 | 7   |
| 499 | 8/8/2013  | 3-Hole     | 27°00.223 | 80°03.993 | 102 | 4   |
| 500 | 8/8/2013  | 3-Hole     | 27°00.223 | 80°03.993 | 123 | 6   |
| 501 | 8/8/2013  | Gulf Land  | 27°04.822 | 80°05.133 | 160 | 9   |
| 502 | 8/8/2013  | Gulf Land  | 27°04.822 | 80°05.133 | 126 | 7   |
| 503 | 8/8/2013  | Tunnels    | 26°56.81  | 80°02.047 | 118 | 6   |
| 504 | 8/8/2013  | Tunnels    | 26°56.81  | 80°02.047 | 123 | 6   |
| 505 | 8/8/2013  | Tunnels    | 26°56.81  | 80°02.047 | 150 | 10  |
| 506 | 8/9/2013  | Sun Tug    | 26°58.478 | 80°00.094 | 153 | 10  |
| 507 | 8/9/2013  | Sun Tug    | 26°58.478 | 80°00.094 | 178 | 14  |
| 508 | 8/9/2013  | MG111      | 26°58.640 | 80°01.496 | 190 | 12  |

|     |          |         |           |            |     |    |
|-----|----------|---------|-----------|------------|-----|----|
| 509 | 8/9/2013 | MG111   | 26°58.640 | 80°01.496  | 191 | 14 |
| 510 |          | FL Keys | 24.63828  | -82.94952  |     |    |
| 511 |          | FL Keys | 24.659045 | -81.280365 |     |    |
| 512 |          | FL Keys | 24.659045 | -81.280365 |     |    |
| 513 |          | FL Keys | 24.659045 | -81.280365 |     |    |
| 514 |          | FL Keys | 24.659045 | -81.280365 |     |    |
| 515 |          | FL Keys | 24.659045 | -81.280365 |     |    |

## References for Supplementary File S2

Goudet, J. (1995). Fstat (version 1.2): A computer program to calculate f- statistics. *Journal of Heredity*, 86(6), 485–486.

Lunt, D.; Hutchinson, W.; Carvalho, G. An efficient method or PCR-based isolation of microsatellite arrays (PIMA). *Mol. Ecol.* **1999**, 8, 891–894.

Raymond, M., & Rousset, F. (1995). GENEPOP (version 1.2): population genetics software for exact tests and ecumenicism. *Journal of Heredity*, 86, 248-249.

Rousset, F. (2008). Genepop'007: a complete reimplementation of the GENEPOP software for Windows and Linux. *Molecular Ecology Resources*, 8, 103-106.

Seyoum, S.; Tringali, M.D.; Sullivan, J.G. Isolation and characterization of 27 polymorphic microsatellite loci for the common snook, *Centropomus undecimalis*. *Mol. Ecol. Notes*. **2005**, 5, 922–927.

Seyoum, S.; Tringali, M.D.; Barthel, B.L.; Puchlutegui, C.; Davis, M.C.; Collins, A.B.; Craig, M.T. Isolation and characterization of 29 polymorphic microsatellite markers for the endangered Atlantic goliath grouper (*Epinephelus itajara*), and the Pacific goliath grouper (*E. quinquefasciatus*). *Cons. Gen. Res.* **2013**, 5, 729–732.

Seyoum, S.; Puchlutegui, C.; McBride, R.S. Isolation and characterization of 24 polymorphic microsatellite loci for the study of genetic population structure of the sheepshead *Archosargus probatocephalus* (Actinopterygii, Perciformes, Sparidae). *BMC Res. Notes* **2016**, 9, 251. DOI 10.1186/s13104-016-2058-7

Waples, R. S.; Antao, T.; Luikart, G. Effects of overlapping generations on linkage disequilibrium estimates of effective population size. *Genetics*, **2014**, 197, 769–780.

Waples, R. K.; Larson, W. A.; Waples, R. S. Estimating contemporary effective population size in non-model species using linkage disequilibrium across thousands of loci. *Heredity*, **2016a**, 117, 233–240.
